# Supplementary material
Source: HighWire-hosted journal article supplement (https://www.cmajopen.ca/highwire/filestream/80854/field_highwire_adjunct_files/4/open-2014-0049-reporting-checklist.pdf)
Supplement: open-2014-0049-reporting-checklist.pdf [file open-2014-0049-reporting-checklist.pdf]

STROBE Statement—Checklist of items that should be included in reports of *cross-sectional studies*

|                              | Item No | Recommendation                                                                                                                                                                                                                                                                                                                                                                                                                                                                                                                                                                                                                                        |
|------------------------------|---------|-------------------------------------------------------------------------------------------------------------------------------------------------------------------------------------------------------------------------------------------------------------------------------------------------------------------------------------------------------------------------------------------------------------------------------------------------------------------------------------------------------------------------------------------------------------------------------------------------------------------------------------------------------|
| <b>Title and abstract</b>    | 1       | <p>(a) Indicate the study's design with a commonly used term in the title or the abstract<br/> <b>- title includes study design</b></p> <p>(b) Provide in the abstract an informative and balanced summary of what was done and what was found<br/> <b>- abstract is an informative summary of entire study</b></p>                                                                                                                                                                                                                                                                                                                                   |
| <b>Introduction</b>          |         |                                                                                                                                                                                                                                                                                                                                                                                                                                                                                                                                                                                                                                                       |
| Background/rationale         | 2       | <p>Explain the scientific background and rationale for the investigation being reported<br/> <b>- provided on page 4</b></p>                                                                                                                                                                                                                                                                                                                                                                                                                                                                                                                          |
| Objectives                   | 3       | <p>State specific objectives, including any prespecified hypotheses<br/> <b>- specified on page 5</b></p>                                                                                                                                                                                                                                                                                                                                                                                                                                                                                                                                             |
| <b>Methods</b>               |         |                                                                                                                                                                                                                                                                                                                                                                                                                                                                                                                                                                                                                                                       |
| Study design                 | 4       | <p>Present key elements of study design early in the paper<br/> <b>- presented in first paragraph of methods section</b></p>                                                                                                                                                                                                                                                                                                                                                                                                                                                                                                                          |
| Setting                      | 5       | <p>Describe the setting, locations, and relevant dates, including periods of recruitment, exposure, follow-up, and data collection<br/> <b>- described in first paragraph of methods section</b></p>                                                                                                                                                                                                                                                                                                                                                                                                                                                  |
| Participants                 | 6       | <p>(a) Give the eligibility criteria, and the sources and methods of selection of participants<br/> <b>- described in first paragraph of methods section</b></p>                                                                                                                                                                                                                                                                                                                                                                                                                                                                                      |
| Variables                    | 7       | <p>Clearly define all outcomes, exposures, predictors, potential confounders, and effect modifiers. Give diagnostic criteria, if applicable<br/> <b>- defined in separate paragraphs throughout the methods section</b></p>                                                                                                                                                                                                                                                                                                                                                                                                                           |
| Data sources/<br>measurement | 8*      | <p>For each variable of interest, give sources of data and details of methods of assessment (measurement). Describe comparability of assessment methods if there is more than one group<br/> <b>- data sources and measures are described when discussing variables of interest</b></p>                                                                                                                                                                                                                                                                                                                                                               |
| Bias                         | 9       | <p>Describe any efforts to address potential sources of bias<br/> <b>- bias is not directly addressed in the methods section, but rather discussed in the limitations section of the discussion</b></p>                                                                                                                                                                                                                                                                                                                                                                                                                                               |
| Study size                   | 10      | <p>Explain how the study size was arrived at<br/> <b>- an explanation of how the study sample was arrived at is included</b></p>                                                                                                                                                                                                                                                                                                                                                                                                                                                                                                                      |
| Quantitative variables       | 11      | <p>Explain how quantitative variables were handled in the analyses. If applicable, describe which groupings were chosen and why<br/> <b>- quantitative variables are described adequately</b></p>                                                                                                                                                                                                                                                                                                                                                                                                                                                     |
| Statistical methods          | 12      | <p>(a) Describe all statistical methods, including those used to control for confounding<br/> <b>- statistical methods are described in detail</b></p> <p>(b) Describe any methods used to examine subgroups and interactions<br/> <b>- descriptions of supplemental analyses are described</b></p> <p>(c) Explain how missing data were addressed<br/> <b>- there was no missing data within our study</b></p> <p>(d) If applicable, describe analytical methods taking account of sampling strategy<br/> <b>- not applicable</b></p> <p>(e) Describe any sensitivity analyses<br/> <b>- descriptions of supplemental analyses are described</b></p> |

|                          |     |                                                                                                                                                                                                                                                                                                                                                                                                                                                                                                                                                                                                        |
|--------------------------|-----|--------------------------------------------------------------------------------------------------------------------------------------------------------------------------------------------------------------------------------------------------------------------------------------------------------------------------------------------------------------------------------------------------------------------------------------------------------------------------------------------------------------------------------------------------------------------------------------------------------|
| <b>Results</b>           |     |                                                                                                                                                                                                                                                                                                                                                                                                                                                                                                                                                                                                        |
| Participants             | 13* | <p>(a) Report numbers of individuals at each stage of study—eg numbers potentially eligible, examined for eligibility, confirmed eligible, included in the study, completing follow-up, and analysed</p> <p><b>- total sample size is included in first paragraph of results</b></p> <p>(b) Give reasons for non-participation at each stage</p> <p><b>- not applicable given the study design</b></p> <p>(c) Consider use of a flow diagram</p> <p><b>- we opted not to use the flow diagram given the number of existing tables and appendices already included</b></p>                              |
| Descriptive data         | 14* | <p>(a) Give characteristics of study participants (eg demographic, clinical, social) and information on exposures and potential confounders</p> <p><b>- demographics described adequately in first paragraph of results</b></p> <p>(b) Indicate number of participants with missing data for each variable of interest</p> <p><b>- not applicable</b></p>                                                                                                                                                                                                                                              |
| Outcome data             | 15* | <p>Report numbers of outcome events or summary measures</p> <p><b>- reported in first and second paragraphs of results</b></p>                                                                                                                                                                                                                                                                                                                                                                                                                                                                         |
| Main results             | 16  | <p>(a) Give unadjusted estimates and, if applicable, confounder-adjusted estimates and their precision (eg, 95% confidence interval). Make clear which confounders were adjusted for and why they were included</p> <p><b>- no unadjusted modelling was performed in this study – only descriptive statistics</b></p> <p>(b) Report category boundaries when continuous variables were categorized</p> <p><b>- boundaries are specified</b></p> <p>(c) If relevant, consider translating estimates of relative risk into absolute risk for a meaningful time period</p> <p><b>- not applicable</b></p> |
| Other analyses           | 17  | <p>Report other analyses done—eg analyses of subgroups and interactions, and sensitivity analyses</p> <p><b>- reported in the methods section with corresponding results in appropriate section</b></p>                                                                                                                                                                                                                                                                                                                                                                                                |
| <b>Discussion</b>        |     |                                                                                                                                                                                                                                                                                                                                                                                                                                                                                                                                                                                                        |
| Key results              | 18  | <p>Summarise key results with reference to study objectives</p> <p><b>- provided in first paragraph of discussion</b></p>                                                                                                                                                                                                                                                                                                                                                                                                                                                                              |
| Limitations              | 19  | <p>Discuss limitations of the study, taking into account sources of potential bias or imprecision. Discuss both direction and magnitude of any potential bias</p> <p><b>- provided in the limitations paragraph</b></p>                                                                                                                                                                                                                                                                                                                                                                                |
| Interpretation           | 20  | <p>Give a cautious overall interpretation of results considering objectives, limitations, multiplicity of analyses, results from similar studies, and other relevant evidence</p> <p><b>- a balance and objective interpretation of the results is provided</b></p>                                                                                                                                                                                                                                                                                                                                    |
| Generalisability         | 21  | <p>Discuss the generalisability (external validity) of the study results</p> <p><b>- generalizability is discussed in the limitations paragraph of the discussion</b></p>                                                                                                                                                                                                                                                                                                                                                                                                                              |
| <b>Other information</b> |     |                                                                                                                                                                                                                                                                                                                                                                                                                                                                                                                                                                                                        |
| Funding                  | 22  | <p>Give the source of funding and the role of the funders for the present study and, if applicable, for the original study on which the present article is based</p> <p><b>- funding sources are provided in a separate paragraph after the manuscript</b></p>                                                                                                                                                                                                                                                                                                                                         |
